# Supplementary material for: Vitamin D in Wild and Farmed Atlantic Salmon (Salmo Salar)—What Do We Know?
Source: PubMed Central journal article supplement (PMC6566758; doi:10.3390/nu11050982), 2019-04-29
Supplement: nutrients-11-00982-s001.pdf [file nutrients-11-00982-s001.pdf]

## Supplementary Material

|                                                               |   |
|---------------------------------------------------------------|---|
| S1. Content in salmon feed for feeding trial.....             | 2 |
| S2. Two-way ANOVA for vitamin D content in farmed salmon..... | 3 |

**Table S1.** Content in salmon feed for feeding trial.

| <b>Ingredients, %</b>                   | <b>Control</b> |
|-----------------------------------------|----------------|
| Fishmeal <sup>1</sup>                   | 17.50          |
| Fish protein concentrate <sup>2</sup>   | 2.50           |
| Soy protein concéntrate <sup>3</sup>    | 17.00          |
| Pea protein concentrate <sup>4</sup>    | 2.50           |
| Wheat gluten <sup>5</sup>               | 10.25          |
| Wheat meal <sup>6</sup>                 | 12.00          |
| Faba beans (low tannins) <sup>7</sup>   | 5.83           |
| Fish oil <sup>8</sup>                   | 27.60          |
| Vitamin and mineral premix <sup>9</sup> | 1.00           |
| Binder <sup>10</sup>                    | 0.30           |
| Antioxidant <sup>11</sup>               | 0.20           |
| Sodium propionate <sup>12</sup>         | 0.10           |
| Monocalcium phosphate <sup>13</sup>     | 2.00           |
| L-Histidine <sup>14</sup>               | 0.10           |
| L-Lysine <sup>15</sup>                  | 0.50           |
| L-Tryptophan <sup>16</sup>              | 0.10           |
| DL-Methionine <sup>17</sup>             | 0.30           |
| L-Taurine <sup>18</sup>                 | 0.22           |

<sup>1</sup> Fishmeal LT70 NORVIK: 70.6% crude protein (CP), 5.8% crude fat (CF), Sopropêche, France. <sup>2</sup> CPSP90: 84% CP, 9.6% CF, SOPROPÊCHE, France. <sup>3</sup> Soycomil P: 63% CP, 0.8% CF, ADM, The Netherlands. <sup>4</sup> Lysamine GPS: 86% CP, 1% CF, ROQUETTE Frères, France. <sup>5</sup> VITAL: 83.7% CP, 1.6% CF, ROQUETTE Frères, France. <sup>6</sup> Wheat meal: 10.2% CP, 1.2% CF, Casa Lanchinha, Portugal. <sup>7</sup> Faba beans: 28.5% CP; 1.2% CF, Ribeiro & Sousa Cereais, Portugal. <sup>8</sup> Sopropêche, France. <sup>9</sup> PREMIX Lda, Portugal: Vitamins (IU or mg/kg diet): DL-alpha tocopherol acetate, 100 mg; sodium menadione bisulphate, 25mg; retinyl acetate, 20000 IU; DL-cholecalciferol, 2000 IU; thiamin, 30mg; riboflavin, 30mg; pyridoxine, 20mg; cyanocobalamin, 0.1mg; nicotinic acid, 200mg; folic acid, 15mg; ascorbic acid, 500mg; inositol, 500mg; biotin, 3mg; calcium panthotenate, 100mg; choline chloride, 1000mg, betaine, 500mg. Minerals (g or mg/kg diet): copper sulphate, 9mg; ferric sulphate, 6mg; potassium iodide, 0.5mg; manganese oxide, 9.6mg; sodium selenite, 0.01mg; zinc sulphate, 7.5mg; sodium chloride, 400mg; excipient wheat middling's. <sup>10</sup> Kieselguhr (natural zeolite), LIGRANA GmbH, Germany. <sup>11</sup> Paramega PX, Kemin Europe NV, Belgium. <sup>12</sup> Disproquímica, Portugal. <sup>13</sup> MCP: 22% P, 18% Ca, Fosfitalia, Italy. <sup>14</sup> L-Histidine 98%, Ajinomoto Eurolysine SAS, France. <sup>15</sup> L-Lysine HCl 99%: Ajinomoto Eurolysine SAS, France. <sup>16</sup> TrypAMINO 98%, Evonik Nutrition & Care GmbH, Germany. <sup>17</sup> DL-METHIONINE FOR AQUACULTURE 99%, EVONIK Nutrition & Care GmbH, Germany. <sup>18</sup> L-Taurine, ORFFA, The Netherlands.

All powder ingredients were mixed accordingly to the target formulation in a double-helix mixer (model 500L, TGC Extrusion, France) and ground (below 400 µm) in a micropulverizer hammer mill (model SH1, Hosokawa-Alpine, Germany). The control diet (pellet size: 7.0 mm) was manufactured with a twin-screw extruder (model BC45, Cletral, France) with a screw diameter of 55.5 mm. Extrusion conditions: feeder rate (77 kg/h), screw speed (247 rpm), water addition in barrel 1 (330 ml/min), temperature barrel 1 (32-34°C), temperature barrel 3 (111-115°C). Extruded pellets were dried in a vibrating fluid bed dryer (model DR100, TGC Extrusion, France). After cooling, the various doses of vitamin D3 (ROVIMIX® D3 500; cholecalciferol at 500 000 IU per gram of product) were blended with the oil and applied post-extrusion to the pellets by vacuum coating (model PG-10VCLAB, Dinnissen, The Netherlands). Immediately after coating, diets were packed in sealed plastic buckets and shipped to Bantry, Ireland.

**Table S2.** Two-way ANOVA table for vitamin D content in farmed salmon.

| <i>Source of Variation</i> | <i>SS</i> | <i>df</i> | <i>MS</i> | <i>F</i> | <i>P-value</i> | <i>F crit</i> |
|----------------------------|-----------|-----------|-----------|----------|----------------|---------------|
| Weeks of feeding           | 11,42857  | 2         | 5,714285  | 5,832773 | 0,0054         | 3,190727      |
| Vitamin D in feed          | 140,3214  | 3         | 46,77379  | 47,74367 | 1,91E-14       | 2,798061      |
| Interaction                | 26,66382  | 6         | 4,443969  | 4,536117 | 0,001019       | 2,294601      |
| Within                     | 47,02492  | 48        | 0,979686  |          |                |               |
| Total                      | 225,4387  | 59        |           |          |                |               |
